# Supplementary material
Source: PubMed Central journal article supplement (PMC10615724)
Supplement: NIHMS1937715-supplement-1.pdf [file NIHMS1937715-supplement-1.pdf]

| <b>Supplemental Table 1: Clinical and Demographic Factors</b> |          |                 |                   |                      |                |
|---------------------------------------------------------------|----------|-----------------|-------------------|----------------------|----------------|
| <b>Variable</b>                                               | <b>N</b> | <b>Overall</b>  | <b>No WMI</b>     | <b>Any WMI</b>       | <b>P-Value</b> |
|                                                               |          | <b>N=67</b>     | <b>N=31</b>       | <b>N=36</b>          |                |
| Pregnancy-Induced hypertension, n (%)                         | 59       | 15 (25.4%)      | 10 (38.5%)        | 5 (15.2%)            | <b>0.04</b>    |
| Chronic hypertension, n (%)                                   | 52       | 9 (17.3%)       | 3 (13.6%)         | 6 (20.0%)            | 0.72           |
| Chorioamnionitis, n (%)                                       | 58       | 8 (13.8%)       | 3 (12.0%)         | 5 (15.2%)            | 0.99           |
| Antenatal Steroids, n (%)                                     | 57       | 45 (78.9%)      | 20 (83.3%)        | 25 (75.8%)           | 0.49           |
| Gestational age (weeks)                                       | 59       | 26 (24.3, 27.5) | 26.6 (25.2, 28.4) | 25.0 (23.6, 26.4)    | <b>0.03</b>    |
| Birth Weight (grams)                                          | 59       | 740 (650, 990)  | 849.5 (650, 1010) | 730.0 (650.0, 911.0) | 0.49           |
| Small for Gestational Age, n (%)                              | 59       | 20 (33.9%)      | 12 (46.2%)        | 8 (24.2%)            | 0.08           |
| Gender (Male), n (%)                                          | 59       | 20 (33.9%)      | 9 (34.6%)         | 11 (33.3%)           | 0.92           |
| Ethnicity, n (%)                                              | 59       |                 |                   |                      | 0.07           |
| Caucasian                                                     |          | 11 (18.6%)      | 2 (7.7%)          | 9 (27.3%)            |                |
| African American                                              |          | 44 (74.6%)      | 21 (80.8%)        | 23 (69.7%)           |                |
| Latino                                                        |          | 2 (3.4%)        | 1 (3.8%)          | 1 (3.0%)             |                |
| Other                                                         |          | 2 (3.4%)        | 2 (7.7%)          | 0 (0.00%)            |                |
| Mode of Delivery, n (%)                                       |          |                 |                   |                      | 0.60           |
| C-section                                                     |          | 41 (69.5%)      | 19 (73.1%)        | 22 (66.7%)           |                |
| Vaginal                                                       | 59       | 18 (30.5%)      | 7 (26.9%)         | 11 (33.3%)           |                |
| Apgar Score <6 at 5 Minutes, n (%)                            | 59       | 19 (32.2%)      | 6 (23.1%)         | 13 (39.4%)           | 0.18           |
| Out born, n (%)                                               | 59       | 34 (57.6%)      | 13 (50.0%)        | 21 (63.6%)           | 0.29           |
| Patent Ductus Arteriosus, n (%)                               | 59       | 38 (64.4%)      | 16 (61.5%)        | 22 (66.7%)           | 0.68           |
| Patent Ductus Arteriosus, Indomethacin Treated, n (%)         | 59       | 9 (15.3%)       | 4 (15.4%)         | 5 (15.2%)            | 0.99           |
| Patent Ductus Arteriosus, Surgically Ligated, n (%)           | 59       | 5 (8.5%)        | 2 (7.7%)          | 3 (9.1%)             | 0.99           |
| Central Line Present (days)                                   | 58       | 49.5 (30, 93)   | 66.5 (32, 93)     | 46.0 (29.5, 81.5)    | 0.32           |
| Positive Blood Culture Sepsis, n (%)                          | 59       | 19 (32.2%)      | 9 (34.6%)         | 10 (30.3%)           | 0.73           |
| CRP on Day of NEC Onset                                       | 51       | 3.2 (1.2, 8.2)  | 4 (1.4, 7.4)      | 3.1 (1.1, 13.8)      | 0.75           |

|                                 |    |                 |                 |                  |              |
|---------------------------------|----|-----------------|-----------------|------------------|--------------|
| CRP at 24 Hours after NEC Onset | 46 | 7.8 (3, 19)     | 7.7 (2.2, 13.6) | 9 (3.2, 19)      | 0.41         |
| CRP at 48 Hours after NEC Onset | 37 | 9 (2.4, 21.9)   | 6.7 (1.3, 19.8) | 15.4 (3.3, 22.0) | 0.17         |
| CRP at 96 Hours after NEC Onset |    |                 |                 |                  |              |
| CRP at 1 Week after NEC Onset   | 42 | 6.4 (4.2, 15.1) | 6 (4.4, 15.1)   | 6.5 (3.7, 12.15) | 0.78         |
| CRP at 2 Week after NEC Onset   | 41 | 5.2 (2.5, 7.5)  | 6.8 (3.5, 7.6)  | 3.8 (1.3, 7.3)   | 0.34         |
| Cholestasis at NEC Onset, n (%) | 43 | 2.6 (1.4, 5.3)  | 2.4 (1.4, 5.5)  | 3 (1.7, 5.2)     | 0.84         |
| AKI by Serum Creatinine         | 59 | 38 (64.4%)      | 15 (57.7%)      | 23 (69.7%)       | 0.34         |
| No AKI                          | 59 |                 |                 |                  | <b>0.001</b> |
| Stage 1                         |    | 27 (45.8%)      | 18 (69.2%)      | 9 (27.3%)        |              |
| Stage 2                         |    | 12 (20.3%)      | 6 (23.1%)       | 6 (18.2%)        |              |
| Stage 3                         |    | 9 (15.3%)       | 1 (3.8%)        | 8 (24.2%)        |              |
| AKI by Urine Output             |    | 11 (18.6%)      | 1 (3.8%)        | 10 (30.3%)       |              |
| No AKI                          | 59 |                 |                 |                  | <b>0.02</b>  |
| Stage 1                         |    | 34 (57.6%)      | 14 (53.8%)      | 20 (60.6%)       |              |
| Stage 2                         |    | 2 (3.4%)        | 1 (3.8%)        | 1 (3.0%)         |              |
| Stage 3                         |    | 17 (28.8%)      | 11 (42.3%)      | 6 (18.2%)        |              |
| Severe AKI                      |    | 6 (10.2%)       | 0 (0.00%)       | 6 (18.2%)        |              |
| Severe AKI                      | 67 | 42 (62.7%)      | 18 (58.1%)      | 24 (66.7%)       | 0.47         |

| <b>Supplemental Table 2: NEC features</b>                                              |          |                  |                  |                |                |
|----------------------------------------------------------------------------------------|----------|------------------|------------------|----------------|----------------|
| <b>Variable</b>                                                                        | <b>N</b> | <b>Overall</b>   | <b>No WMI</b>    | <b>Any WMI</b> | <b>P-Value</b> |
|                                                                                        |          | <b>N=67</b>      | <b>N=31</b>      | <b>N=36</b>    |                |
| Clinical presentation, n (%)                                                           |          |                  |                  |                | 0.79           |
| Abdominal Distension                                                                   | 59       | 54 (91.5%)       | 23 (88.5%)       | 31 (93.9%)     |                |
| Bloody Stools                                                                          |          | 3 (5.1%)         | 2 (7.7%)         | 1 (3.0%)       |                |
| Feeding Intolerance                                                                    |          | 2 (3.4%)         | 1 (3.8%)         | 1 (3.0%)       |                |
| Pneumatosis                                                                            | 59       | 22 (37.3%)       | 7 (26.9%)        | 15 (45.5%)     | 0.14           |
| Pneumoperitoneum                                                                       | 59       | 35 (59.3%)       | 13 (50.0%)       | 22 (66.7%)     | 0.20           |
| Portal Venous Gas                                                                      | 59       | 2 (3.4%)         | 1 (3.8%)         | 1 (3.0%)       | 0.99           |
| Age of NEC Onset (days), median (IQR)                                                  | 25       | 8 (6, 23)        | 10.0 (6.5, 25.0) | 7 (5, 8)       | 0.46           |
| Fulminant NEC, n (%)                                                                   | 59       | 4 (6.8%)         | 2 (7.7%)         | 2 (6.1%)       | 0.99           |
| Present of Penrose Drain, n (%)                                                        | 57       | 25 (43.9%)       | 10 (40.0%)       | 15 (46.9%)     | 0.60           |
| Surgery < 48 Hours, n (%)                                                              | 59       | 40 (67.8%)       | 17 (65.4%)       | 23 (69.7%)     | 0.73           |
| Length of Bowel Resected (cm), median (IQR)                                            | 59       | 12.7 (3.7, 28.8) | 9.3 (3.7, 24.9)  | 14.4 (8, 29.6) | 0.40           |
| Region of Bowel Resected, n (%)                                                        | 54       |                  |                  |                | 0.13           |
| Small Bowel Resected                                                                   |          | 35 (64.8%)       | 17 (70.8%)       | 18 (60.0%)     |                |
| Large bowel resected                                                                   |          | 2 (3.7%)         | 2 (8.3%)         | 0 (0.00%)      |                |
| Combined large and Small Bowel Resected                                                |          | 17 (31.5%)       | 5 (20.8%)        | 12 (40.0%)     |                |
| Presence of Ileocecal Valve, n (%)                                                     | 58       | 45 (77.6%)       | 24 (92.3%)       | 21 (65.6%)     | <b>0.015</b>   |
| Surgical Morbidity (Infection, Adhesions, Strictures, Dehiscence), n (%)               | 67       | 23 (34.3%)       | 11 (35.5%)       | 12 (33.3%)     | 0.85           |
| Single Surgical Morbidity (Infection, Adhesions, Strictures, Dehiscence), n (%)        | 67       | 15 (22.4%)       | 7 (22.6%)        | 8 (22.2%)      | 0.97           |
| More than One Surgical Morbidity (Infection, Adhesions, Strictures, Dehiscence), n (%) | 67       | 7 (10.4%)        | 3 (9.7%)         | 4 (11.1%)      | 0.99           |
| Adhesions, n (%)                                                                       | 67       | 9 (13.4%)        | 5 (16.1%)        | 4 (11.1%)      | 0.72           |
| Wound Dehiscence, n (%)                                                                | 67       | 8 (11.9%)        | 2 (6.5%)         | 6 (16.7%)      | 0.27           |

|                             |    |            |            |            |      |
|-----------------------------|----|------------|------------|------------|------|
| Wound Infection, n (%)      | 67 | 3 (4.5%)   | 1 (3.2%)   | 2 (5.6%)   | 0.99 |
| Stricture, n (%)            | 67 | 5 (7.5%)   | 4 (12.9%)  | 1 (2.8%)   | 0.17 |
| Fistula, n (%)              | 67 | 3 (4.5%)   | 1 (3.2%)   | 2 (5.6%)   | 0.99 |
| Compartment Syndrome, n (%) | 67 | 1 (1.5%)   | 1 (3.2%)   | 0 (0.00%)  | 0.46 |
| Short Bowel Syndrome, n (%) | 50 | 29 (58.0%) | 10 (47.6%) | 19 (65.5%) | 0.21 |

| <b>Supplemental Table 3: Analgesics/Sedatives/steroids before, during and after NEC Onset</b> |          |                     |                     |                     |                |
|-----------------------------------------------------------------------------------------------|----------|---------------------|---------------------|---------------------|----------------|
| <b>Variable</b>                                                                               | <b>N</b> | <b>Overall</b>      | <b>No WMI</b>       | <b>Any WMI</b>      | <b>P-Value</b> |
|                                                                                               |          | <b>N=67</b>         | <b>N=31</b>         | <b>N=36</b>         |                |
| <b>From Birth Until NEC onset</b>                                                             |          |                     |                     |                     |                |
| Morphine mg/kg, mean ( $\pm$ SD)                                                              | 61       | 0.0 (0.0)           | 0.0 (0.0)           | 0.0 (0.0)           | 0.99           |
| Fentanyl mg/kg, mean ( $\pm$ SD)                                                              | 67       | 0.0 (0.1)           | 0.0 (0.1)           | 0.0 (0.0)           | 0.99           |
| Fentanyl (mcg /kg) median (IQR)                                                               |          | 0 (0, 0.6)          | 0 (0, 0.5)          | 0 (0, 0.6)          | 0.99           |
| Midazolam, mg/kg, mean ( $\pm$ SD)                                                            | 67       | 0.0 (0.1)           | 0.0 (0.1)           | 0.0 (0.0)           | 0.99           |
| Methadone, mg/kg, mean ( $\pm$ SD)                                                            | 67       | 0.0 (0.0)           | 0.0 (0.0)           | 0.0 (0.0)           | 0.99           |
| Dexamethasone, mg/kg, mean ( $\pm$ SD)                                                        | 63       | 0.0 (0.0)           | 0.0 (0.0)           | 0.0 (0.0)           | 0.99           |
| Hydrocortisone, mg/kg, mean ( $\pm$ SD)                                                       | 67       | 1.1 (5.1)           | 0.3 (1.4)           | 1.8 (6.8)           | 0.99           |
| <b>From NEC onset +2 weeks</b>                                                                |          |                     |                     |                     |                |
| Morphine mg/kg, mean ( $\pm$ SD)                                                              | 67       | 0.0 (0.1)           | 0.0 (0.1)           | 0.0 (0.1)           | 0.69           |
| Fentanyl mg/kg, mean ( $\pm$ SD)                                                              | 67       | 0.3 (0.3)           | 0.3 (0.3)           | 0.4 (0.4)           | 0.11           |
| Fentanyl (mcg /kg) median (IQR)                                                               |          | 237.2 (85.5, 574.8) | 236.4 (64.8, 698.8) | 238 (133.4, 560.2)  | 0.76           |
| Midazolam, mg/kg, mean ( $\pm$ SD)                                                            | 67       | 0.2 (1.0)           | 0.3 (1.4)           | 0.1 (0.2)           | 0.99           |
| Methadone, mg/kg, mean ( $\pm$ SD)                                                            | 67       | 0.0 (0.0)           | 0.0 (0.1)           | 0.0 (0.0)           | 0.99           |
| Dexamethasone, mg/kg, mean ( $\pm$ SD)                                                        | 67       | 0.0 (0.1)           | 0.0 (0.0)           | 0.0 (0.2)           | 0.99           |
| Hydrocortisone, mg/kg, mean ( $\pm$ SD)                                                       | 67       | 7.9 (11.2)          | 4.5 (8.0)           | 10.9 (12.8)         | 0.09           |
| <b>From end of 2 weeks to MRI</b>                                                             |          |                     |                     |                     |                |
| Morphine mg/kg, mean ( $\pm$ SD)                                                              | 67       | 2.0 (12.0)          | 0.9 (4.6)           | 3.0 (15.8)          | 0.80           |
| Fentanyl mg/kg, mean ( $\pm$ SD)                                                              | 67       | 381.8 (1051.4)      | 217.2 (645.1)       | 523.5 (1297.4)      | 0.29           |
| Fentanyl (mcg /kg) median (IQR)                                                               |          | 162.5 (41.3, 592)   | 120.7 (30, 346.57)  | 168.9 (51.2, 699.7) | 0.90           |
| Midazolam, mg/kg, mean ( $\pm$ SD)                                                            | 67       | 2.1 (11.2)          | 1.0 (3.3)           | 3.0 (15.1)          | 0.99           |
| Methadone, mg/kg, mean ( $\pm$ SD)                                                            | 67       | 2.0 (10.3)          | 1.0 (5.4)           | 2.9 (13.2)          | 0.99           |
| Dexamethasone, mg/kg, mean ( $\pm$ SD)                                                        | 67       | 0.5 (1.7)           | 0.4 (1.7)           | 0.5 (1.7)           | 0.88           |
| Hydrocortisone, mg/kg, mean ( $\pm$ SD)                                                       | 67       | 7.8 (22.6)          | 2.8 (7.8)           | 12.2 (29.4)         | 0.28           |
| Corrected Gestational Age At MRI                                                              | 59       | 41.1                | 40.9                | 41.1                | 0.46           |

**Supplemental Table 4: Peri-operative Hemodynamic information**

|                                                             | N  | Overall       | No -WMI           | Any WMI           | P-Value      |
|-------------------------------------------------------------|----|---------------|-------------------|-------------------|--------------|
|                                                             |    | N=67          | N=31              | N=36              |              |
| Number of surgical procedures receiving sedative/analgesics | 66 | 4 (2, 7)      | 3 (2, 4)          | 5 (3, 8)          | <b>0.002</b> |
| <b>Primary Surgery</b>                                      |    |               |                   |                   |              |
| Duration of Primary Surgery in minutes, median (IQR)        | 60 | 97 (78, 123)  | 102 (82.5, 121.0) | 94.5 (72.5, 125)  | 0.92         |
| Duration of Hypotension in hours, median (IQR)              | 59 | 36 (11, 48)   | 15.5 (6, 48)      | 48 (26.0, 48.0)   | <b>0.009</b> |
| Duration of Dopamine in hours, median (IQR)                 | 56 | 46 (0, 48)    | 0 (0, 48)         | 48 (26.0, 48.0)   | 0.07         |
| Duration of Hydrocortisone in days, median (IQR)            | 56 | 0 (0, 10)     | 0 (0, 9)          | 5 (0, 10)         | 0.84         |
| Total Number of Fluid Boluses median (IQR)                  | 61 | 2 (0, 3)      | 1 (0, 3)          | 2 (0, 3)          | 0.80         |
| <b>Secondary Surgery</b>                                    |    |               |                   |                   |              |
| Duration of Secondary Surgery in minutes, median (IQR)      | 61 | 103 (77, 145) | 105 (88.0, 146.0) | 100 (74.0, 135.0) | 0.45         |
| Duration of Hypotension in hours, median (IQR)              | 58 | 9 (0, 48)     | 0(0, 22)          | 20 (0, 48. 0)     | <b>0.017</b> |
| Duration of Dopamine in hours, median (IQR)                 | 58 | 0 (0, 43)     | 0 (0, 0)          | 0 (0, 48)         | <b>0.04</b>  |
| Duration of Hydrocortisone in days, median (IQR)            | 57 | 0 (0, 3)      | 0 (0, 0)          | 0 (0, 5)          | 0.09         |
| Total Number of Fluid Boluses median (IQR)                  | 60 | 1 (0, 2)      | 0 (0, 1.5)        | 1 (0, 2)          | 0.34         |

| <b>Supplemental Table 5: Primary Surgery Variables</b> |          |                |               |                |                |
|--------------------------------------------------------|----------|----------------|---------------|----------------|----------------|
|                                                        | <b>N</b> | <b>Overall</b> | <b>No WMI</b> | <b>Any WMI</b> | <b>P-Value</b> |
|                                                        |          | <b>N=67</b>    | <b>N=31</b>   | <b>N=36</b>    |                |
| Spontaneous Intestinal Perforation                     | 62       | 19 (30.6%)     | 9 (32.1%)     | 10 (29.4%)     | 0.82           |
| Primary Surgery Indication Penrose Drain               | 65       | 37 (56.9%)     | 19 (63.3%)    | 18 (51.4%)     | 0.33           |
| Primary Intervention Penrose                           | 67       | 56 (83.6%)     | 27 (87.1%)    | 29 (80.6%)     | 0.47           |
| Primary Intervention Laparotomy                        |          | 11 (16.4%)     | 4 (12.9%)     | 7 (19.4%)      |                |
| Type of Anesthetic Agent Used                          | 67       |                |               |                |                |
| Isoflurane/Sevoflurane/Desflurane                      |          | 5 (7.5%)       | 1 (3.2%)      | 4 (11.1%)      | 0.36           |
| Fentanyl                                               |          | 54 (80.6%)     | 24 (77.4%)    | 30 (83.3%)     | 0.54           |
| Propofol                                               |          | 11 (16.4%)     | 7 (22.6%)     | 4 (11.1%)      | 0.21           |
| Paralytic used During Surgery                          | 60       | 51 (85.0%)     | 23 (82.1%)    | 28 (87.5%)     | 0.72           |
| Type of Paralytic Used                                 | 51       |                |               |                |                |
| Rocuronium                                             |          | 49 (96.1%)     | 22 (95.7%)    | 27 (96.4%)     | 0.99           |
| Other                                                  |          | 2 (3.9%)       | 1 (4.3%)      | 1 (3.6%)       |                |
| Hemodynamics                                           | 60       |                |               |                |                |
| Normothermia                                           |          | 39 (65.0%)     | 21 (75.0%)    | 18 (56.3%)     | 0.13           |
| Hypotension                                            |          | 21 (35.0%)     | 7 (25.0%)     | 14 (43.8%)     |                |
| Fluids Used                                            | 67       |                |               |                |                |
| Normal Saline                                          |          | 14 (20.9%)     | 8 (25.8%)     | 6 (16.7%)      | 0.36           |
| Albumin                                                |          | 41 (61.2%)     | 18 (58.1%)    | 23 (63.9%)     | 0.63           |
| Blood                                                  |          | 22 (32.8%)     | 11 (35.5%)    | 11 (30.6%)     | 0.67           |
| Platelets                                              |          | 10 (14.9%)     | 4 (12.9%)     | 6 (16.7%)      | 0.74           |
| Other                                                  |          | 25 (37.3%)     | 14 (45.2%)    | 11 (30.6%)     | 0.22           |
| Number of Fluid Boluses Administered                   | 61       | 6 (9.8%)       | 2 (7.1%)      | 4 (12.1%)      | 0.68           |
| Use of Inotropes                                       | 61       | 18 (29.5%)     | 5 (17.9%)     | 13 (39.4%)     | 0.07           |
| Type of Inotrope Used                                  | 67       |                |               |                |                |
| Dopamine                                               |          | 11 (16.4%)     | 2 (6.5%)      | 9 (25.0%)      | <b>0.04</b>    |
| Temperature Before Surgery                             | 60       |                |               |                |                |
| Hypothermia                                            |          | 5 (8.3%)       | 2 (7.7%)      | 3 (8.8%)       | 0.99           |
| Normothermia                                           |          | 55 (91.7%)     | 24 (92.3%)    | 31 (91.2%)     |                |
| Temperature After Surgery                              | 61       |                |               |                |                |
| Hypothermia                                            |          | 8 (13.1%)      | 3 (11.1%)     | 5 (14.7%)      | 0.99           |
| Normothermia                                           |          | 53 (86.9%)     | 24 (88.9%)    | 29 (85.3%)     |                |

|                               |    |            |            |            |      |
|-------------------------------|----|------------|------------|------------|------|
| Hydrocortisone Administration | 62 | 36 (58.1%) | 19 (70.4%) | 17 (48.6%) | 0.09 |
|-------------------------------|----|------------|------------|------------|------|

| <b>Supplemental Table 6: Secondary surgery variables</b> |          |                |               |                |                |
|----------------------------------------------------------|----------|----------------|---------------|----------------|----------------|
|                                                          | <b>N</b> | <b>Overall</b> | <b>No WMI</b> | <b>Any WMI</b> | <b>P-Value</b> |
|                                                          |          | <b>N=67</b>    | <b>N=31</b>   | <b>N=36</b>    |                |
| Indication for Secondary Surgery                         |          |                |               |                |                |
| Retinopathy Surgery                                      | 65       | 2 (3.1%)       | 0 (0.00%)     | 2 (5.7%)       | <b>0.03</b>    |
| Inguinal Surgery                                         |          | 25 (38.5%)     | 16 (53.3%)    | 9 (25.7%)      |                |
| Abdominal Surgery                                        |          | 38 (58.5%)     | 14 (46.7%)    | 24 (68.6%)     |                |
| Indication for Secondary Abdominal Surgery               |          |                |               |                |                |
| Re anastomosis                                           | 67       | 17 (25.4%)     | 7 (22.6%)     | 10 (27.8%)     | 0.62           |
| Management Complication                                  |          | 7 (10.4%)      | 1 (3.2%)      | 6 (16.7%)      | 0.11           |
| Type of Anesthetic Agent Used                            |          |                |               |                |                |
| Isoflurane/Sevoflurane/Desflurane                        | 67       |                |               |                | 0.47           |
| Fentanyl                                                 |          | 56 *83.6%      | 27 (87.1%)    | 29 (80.6%)     |                |
| Paralytic used During Surgery                            | 60       | 57 (95.0%)     | 27 (100.0%)   | 30 (90.9%)     | 0.24           |
| Type of Paralytic Used                                   |          |                |               |                |                |
| Rocuronium                                               | 57       | 57 (100.0%)    | 27 (100.0%)   | 30 (100.0%)    | -              |
| Hemodynamics                                             |          |                |               |                |                |
| Normothermia                                             | 60       | 47 (78.3%)     | 23 (85.2%)    | 24 (72.7%)     | 0.24           |
| Hypotension                                              |          | 13 (21.7%)     | 4 (14.8%)     | 9 (27.3%)      |                |
| Fluid Bolus Administered                                 | 60       | 6 (10.0%)      | 3 (11.1%)     | 3 (9.1%)       | 0.99           |
| Fluids Used                                              |          |                |               |                |                |
| Normal Saline                                            | 67       | 14 (20.9%)     | 8 (25.8%)     | 6 (16.7%)      | 0.35           |
| Albumin                                                  |          | 38 (56.7%)     | 20 (64.5%)    | 18 (50.0%)     | 0.23           |
| Blood                                                    |          | 8 (11.9%)      | 5 (16.1%)     | 3 (8.3%)       | 0.45           |
| Other                                                    |          | 39 (58.2%)     | 18 (58.1%)    | 21 (58.3%)     | 0.98           |
| Inotropes used                                           | 60       | 13 (21.7%)     | 3 (11.1%)     | 10 (30.3%)     | 0.07           |
| Types of Inotropes used                                  |          |                |               |                |                |
| Dopamine                                                 | 67       | 15 (22.4%)     | 3 (9.7%)      | 12 (33.3%)     | <b>0.02</b>    |
| Hydrocortisone Administration                            | 64       | 16 (25.0%)     | 4 (13.3%)     | 12 (35.3%)     | <b>0.04</b>    |
| Temperature Before Surgery                               |          |                |               |                |                |
| Hypothermia                                              | 64       | 3 (4.7%)       | 1 (3.3%)      | 2 (5.9%)       | 0.99           |
| Normothermia                                             |          | 61 (95.3%)     | 29 (96.7%)    | 32 (94.1%)     |                |
| Temperature during Secondary Surgery                     |          |                |               |                |                |
| Hypothermia                                              | 60       | 16 (26.7%)     | 9 (33.3%)     | 7 (21.2%)      | 0.29           |

|                           |    |            |            |            |      |
|---------------------------|----|------------|------------|------------|------|
| Normothermia              |    | 44 (73.3%) | 18 (66.7%) | 26 (78.8%) |      |
| Temperature After Surgery | 64 |            |            |            |      |
| Hypothermia               |    | 6 (9.4%)   | 3 (10.0%)  | 3 (8.8%)   | 0.99 |
| Normothermia              |    | 58 (90.6%) | 27 (90.0%) | 31 (91.2%) |      |

| <b>Supplemental Table 7: Postoperative and Clinical features</b>     |          |                |                     |                      |                |
|----------------------------------------------------------------------|----------|----------------|---------------------|----------------------|----------------|
| <b>Variable</b>                                                      | <b>N</b> | <b>Overall</b> | <b>No WMI</b>       | <b>Any WMI</b>       | <b>P-Value</b> |
|                                                                      |          | <b>N=67</b>    | <b>N=31</b>         | <b>N=36</b>          |                |
| Postoperative Ileus Days (days), median (IQR)                        | 56       | 13 (9.5, 17)   | 11.0 (9.0, 14.0)    | 14.0 (11.0, 20.0)    | 0.23           |
| Postoperative Day at Starting Enteral Feedings (days), median (IQR)  | 55       | 14 (10, 18)    | 12.0 (10.0, 15.0)   | 15.5 (13, 21)        | 0.10           |
| Day of Attainment of Full Enteral Feedings (120 mL/kg), median (IQR) | 51       | 69 (30, 89)    | 57.0 (27.0, 76.0)   | 78.0 (34.0, 109.0)   | <b>0.034</b>   |
| Duration of Parenteral Nutrition (days), median (IQR)                | 59       | 108 (69, 147)  | 87.0 (57.0, 118.0)  | 121.0 (81.0, 159.0)  | <b>0.035</b>   |
| Breast Milk, n (%)                                                   | 59       | 12 (20.3%)     | 5 (19.2%)           | 7 (21.2%)            | 0.85           |
| Donor Milk, n (%)                                                    | 59       | 13 (22.0%)     | 6 (23.1%)           | 7 (21.2%)            | 0.86           |
| Formula Feeds, n (%)                                                 | 59       | 36 (61.0%)     | 15 (57.7%)          | 21 (63.6%)           | 0.64           |
| Breast Milk and Formula Feeds, n (%)                                 | 59       | 14 (23.7%)     | 5 (19.2%)           | 9 (27.3%)            | 0.47           |
| Assisted Ventilation (intubated), n (%)                              | 57       |                |                     |                      | 0.37           |
| Intubated                                                            |          | 50 (87.7%)     | 21 (84.0%)          | 29 (90.6%)           |                |
| High Flow Nasal Cannula                                              |          | 5 (8.8%)       | 2 (8.0%)            | 3 (9.4%)             |                |
| Room Air                                                             |          | 2 (3.5%)       | 2 (8.0%)            | 0 (0.00%)            |                |
| 24h Presser Support, n (%)                                           | 59       | 44 (74.6%)     | 15 (57.7%)          | 29 (87.9%)           | <b>0.008</b>   |
| Postnatal Use of Steroids, n (%)                                     | 59       | 36 (61.0%)     | 13 (50.0%)          | 23 (69.7%)           | 0.12           |
| Length of Stay (days), median (IQR)                                  | 59       | 161 (108, 184) | 113.0 (85.0, 171.0) | 175.0 (136.0, 200.0) | <b>0.005</b>   |
| Death, n (%)                                                         | 59       | 53 (89.8%)     | 24 (92.3%)          | 29 (87.9%)           | 0.68           |
